# Supplementary material for: Comparative assessment of vaccine vectors encoding ten malaria antigens identifies two protective liver-stage candidates
Source: Sci Rep. 2015 Jul 3;5:11820. doi: 10.1038/srep11820 (PMC4490344; doi:10.1038/srep11820)
Supplement: Supplementary Information [file srep11820-s1.pdf]

## **Supplementary Information**

### **Comparative assessment of vaccine vectors encoding ten malaria antigens identifies two protective liver-stage candidates**

Rhea J. Longley<sup>1,¶,‡,\*</sup>, Ahmed M. Salman<sup>1,2,¶</sup>, Matthew G. Cottingham<sup>1</sup>,  
Katie Ewer<sup>1</sup>, Chris J. Janse<sup>2</sup>, Shahid M. Khan<sup>2</sup>, Alexandra J. Spencer<sup>1,†</sup>,  
Adrian V. S. Hill<sup>1,†</sup>

**a PfCSP**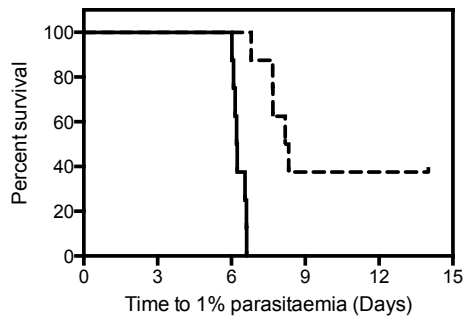**b PfTRAP**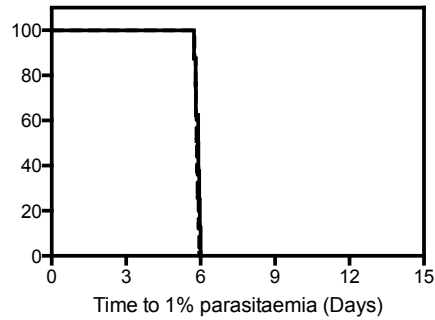**c PfLSAP1**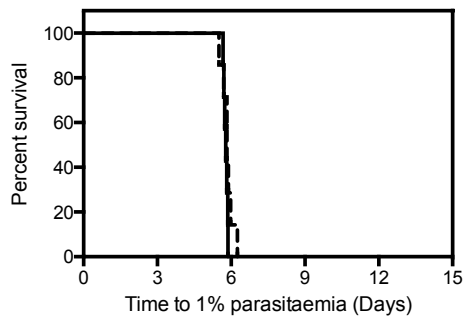**d PfETRAMP5**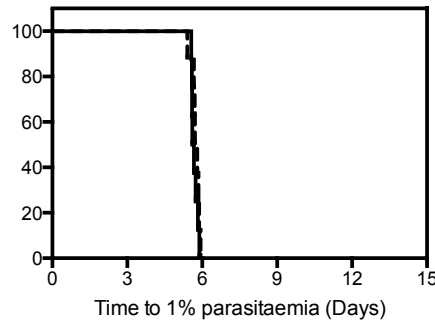**e PfCelTOS**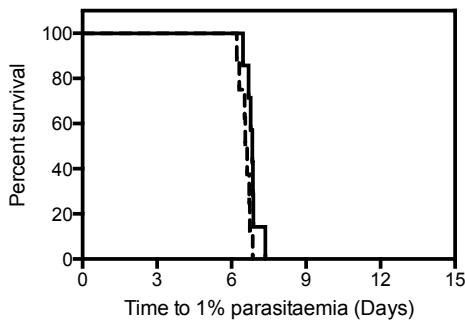**f PfUIS3**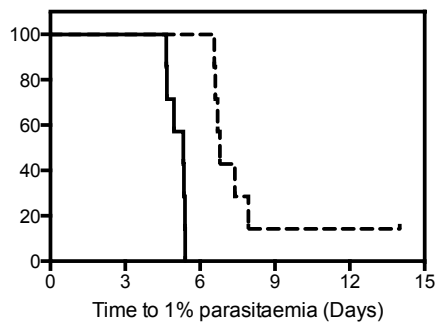**g PfLSAP2**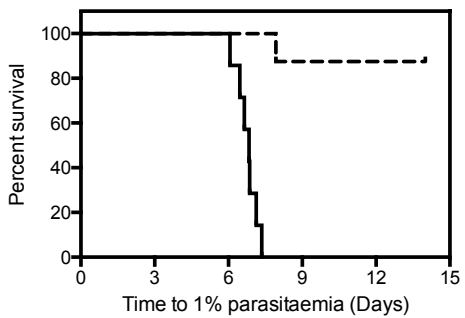**h PfFalstatin**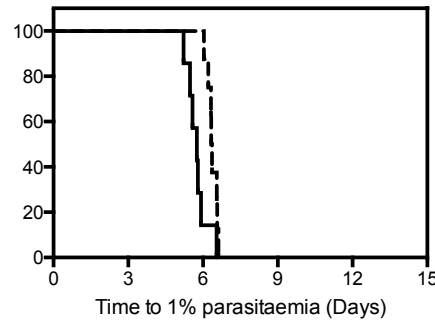**i PfLSA1**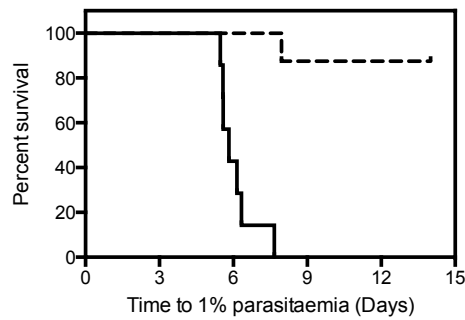**j PfLSA3**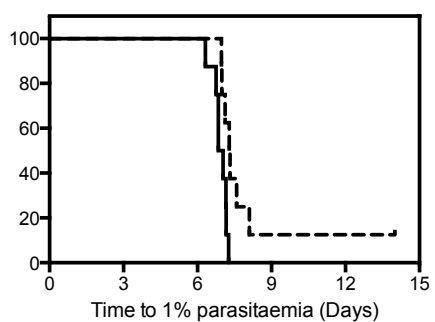

-- Vaccinated    — Naive

**Figure S1. ChAd63-MVA *P. falciparum* vaccines can provide protection in BALB/c mice.** (a-j) Eight vaccinated and eight naïve mice were challenged with 1000 chimeric sporozoites i.v. The Kaplan-Meier curves illustrate the time to 1% parasitaemia, whilst statistical significance between the survival curves was assessed using the Log-Rank (Mantel-Cox) Test, (a) PfCSP  $p=0.03$ , (b) PfTRAP  $p=0.3$ , (c) PfLSAP1  $p=0.2$ , (d) PfETRAMP5  $p=0.3$ , (e) PfCelTOS  $p=0.03$ , (f) PfUIS3  $p=0.0001$ , (g) PfLSAP2  $p<0.0001$ , (h) PfFalstatin  $p=0.007$ , (i) PfLSA1  $p<0.0001$  and (j) PfLSA3  $p=0.01$ . For the PfLSA3 challenge, the chimeric sporozoite dose was increased to 2000 sporozoites per mouse in order to infect all naïve controls.

**a PfCSP**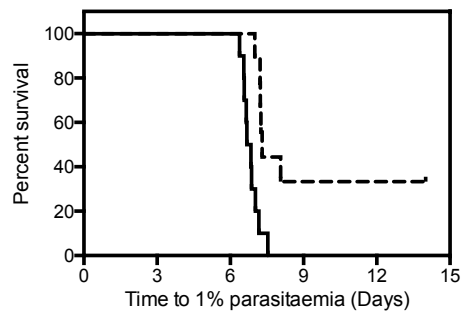**b PfTRAP**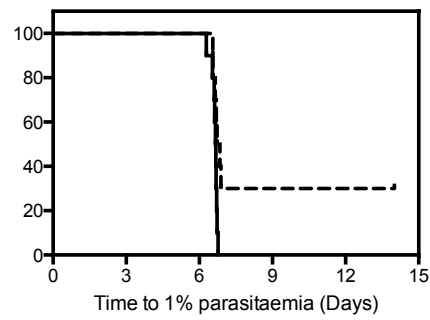**c PfLSAP1**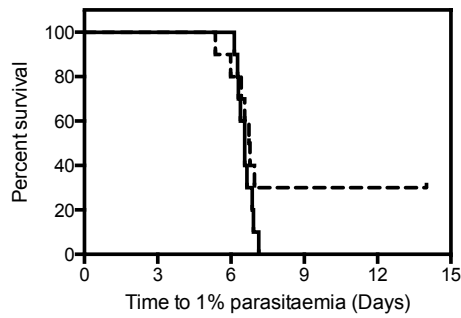**d PfETRAMP5**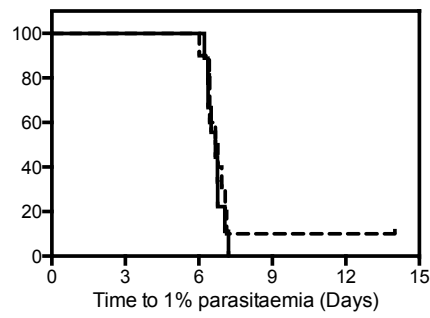**e PfCeITOS**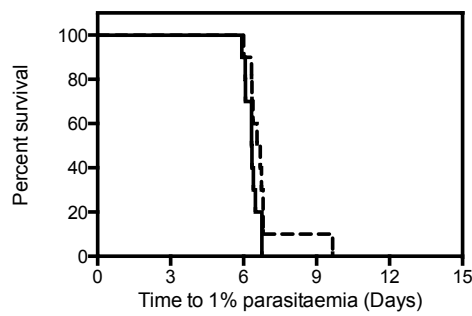**f PfUIS3**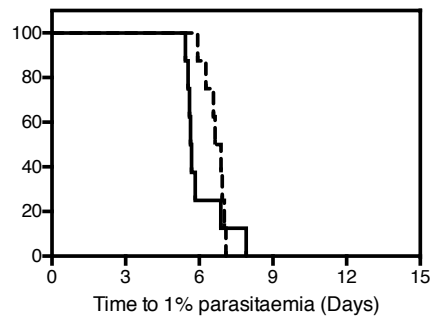**g PfLSAP2**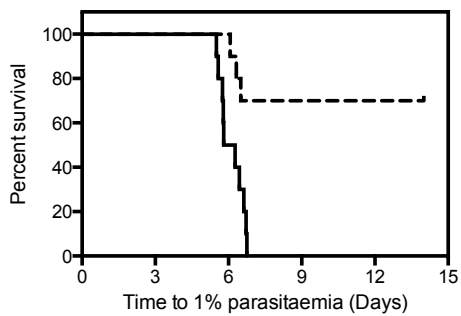**h PfFalstatin**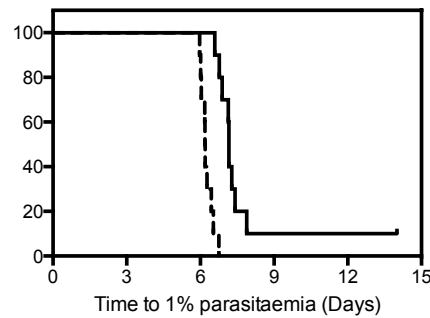**i PfLSA1**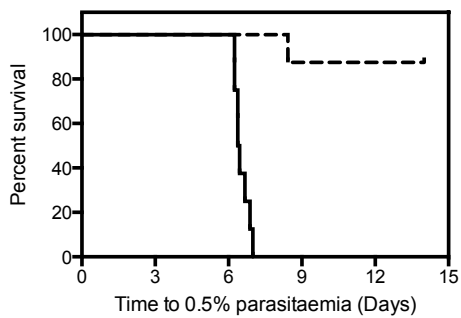**j PfLSA3**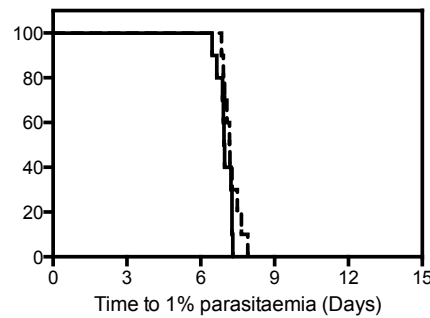

-- PfLSA1

— Naive

**Figure S2. ChAd63-MVA *P. falciparum* vaccines can provide protection in CD-1 mice.** (a-j) Eight to ten vaccinated and eight to ten naïve mice were challenged with 1000 chimeric sporozoites i.v. The Kaplan-Meier curves illustrate the time to 1% parasitaemia, whilst statistical significance between the survival curves was assessed using the Log-Rank (Mantel-Cox) Test: (a) PfCSP  $p=0.001$ , (b) PfTRAP  $p=0.02$ , (c) PfLSAP1  $p=0.16$ , (d) PfETRAMP5  $p=0.45$ , (e) PfCelTOS  $p=0.097$ , (f) PfUIS3  $p=0.25$ , (g) PfLSAP2  $p=0.0009$  (h) PfFalstatin  $p<0.0001$ , (i) PfLSA1  $p<0.0001$  and (h) PfLSA3  $p=0.15$ . For the PfLSA3 challenge, the chimeric sporozoite dose was increased to 2000 sporozoites per mouse in order to infect all naïve controls.

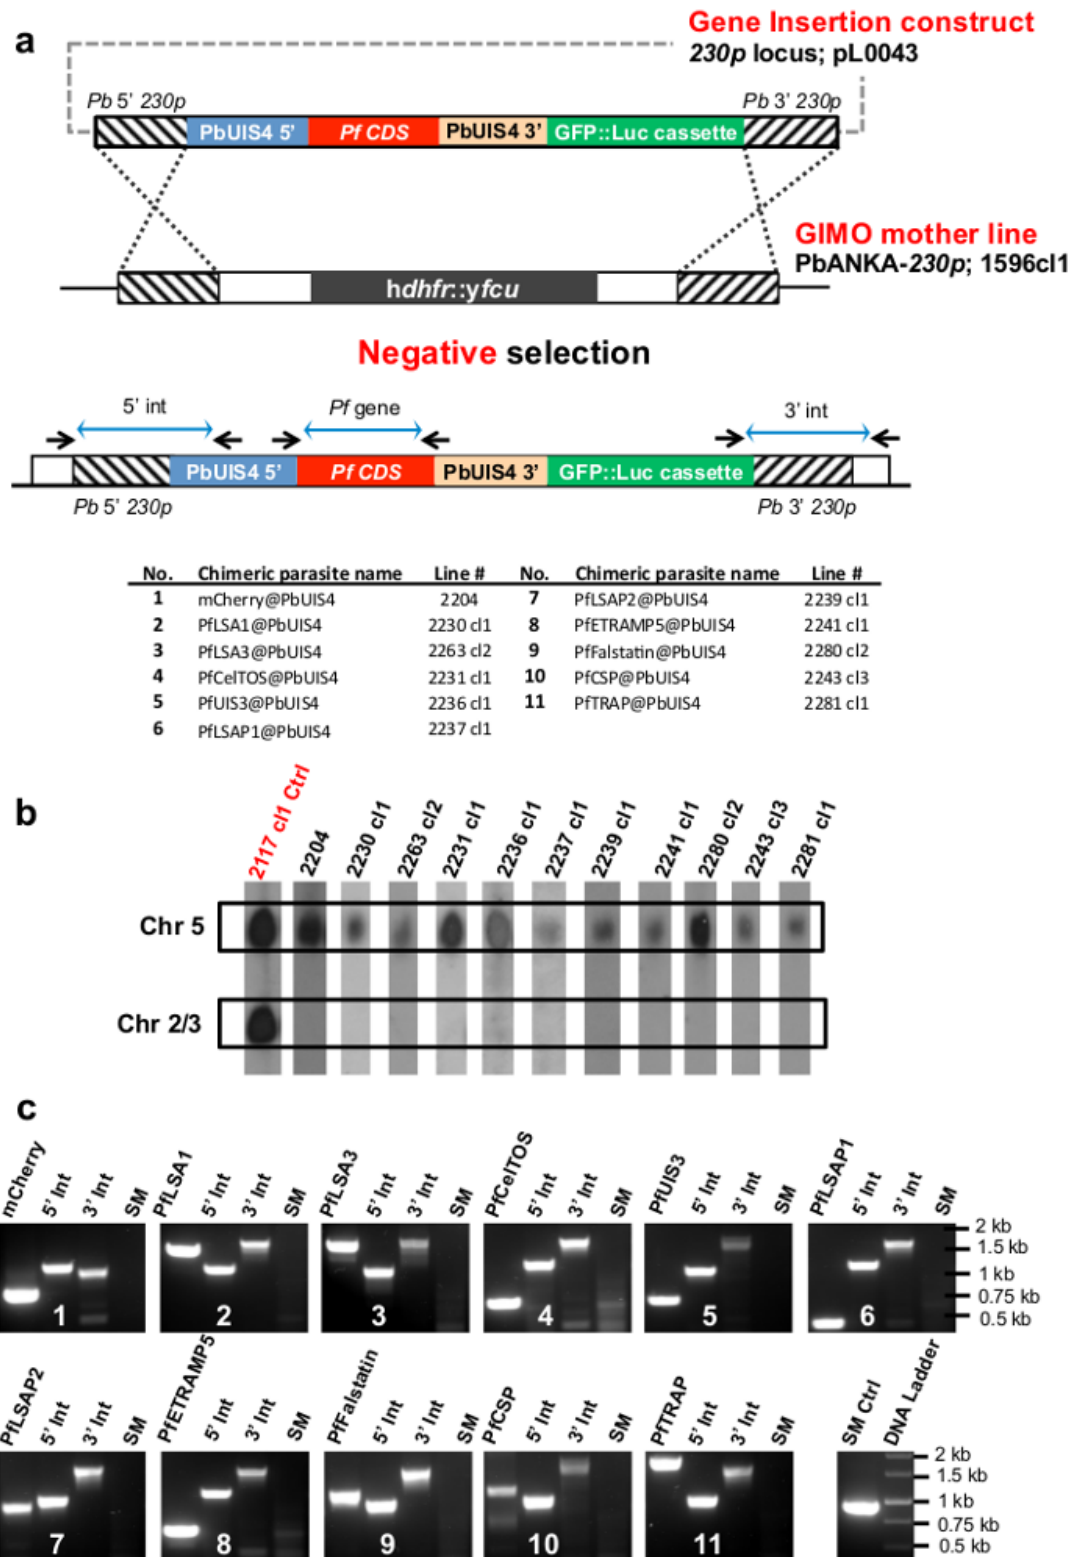

**Figure S3. All chimeric *P. berghei* parasite clones contain the correct genotype.**

(a) Schematic representation showing the introduction of the constructs that contain the '*P. falciparum* antigen expression-cassette' into the 230p locus of the *P. berghei*

ANKA GIMO mother line by GIMO-transfection using negative selection (5-FC). Black arrows: location of PCR primers used for diagnostic PCR-analysis (see panel c). CDS, coding sequence. **(b)** Southern analysis of chromosomes (Chr) of chimeric parasite lines separated by pulsed-field gel electrophoresis to confirm integration of the DNA construct in the GIMO locus (*230p* on Chr 3), shown as the removal of the *hdhfr::yfcu* SM cassette in cloned chimeric parasites compared to a control probe recognising Chr 5. As an additional control (Ctrl), parasite line 2117c11 is also shown as it retains *hdhfr::yfcu* SM in the *230p* locus on Chr 3. **(c)** Diagnostic PCR analysis of chimeric parasite lines confirming correct integration of the *P. falciparum* antigen expression cassettes. Correct integration in all lines is shown by the absence of the *hdhfr::yfcu* SM, the presence of the *P. falciparum* gene coding sequence and the correct integration of the construct into the genome at both the 5' and 3' regions (5' int and 3' int).

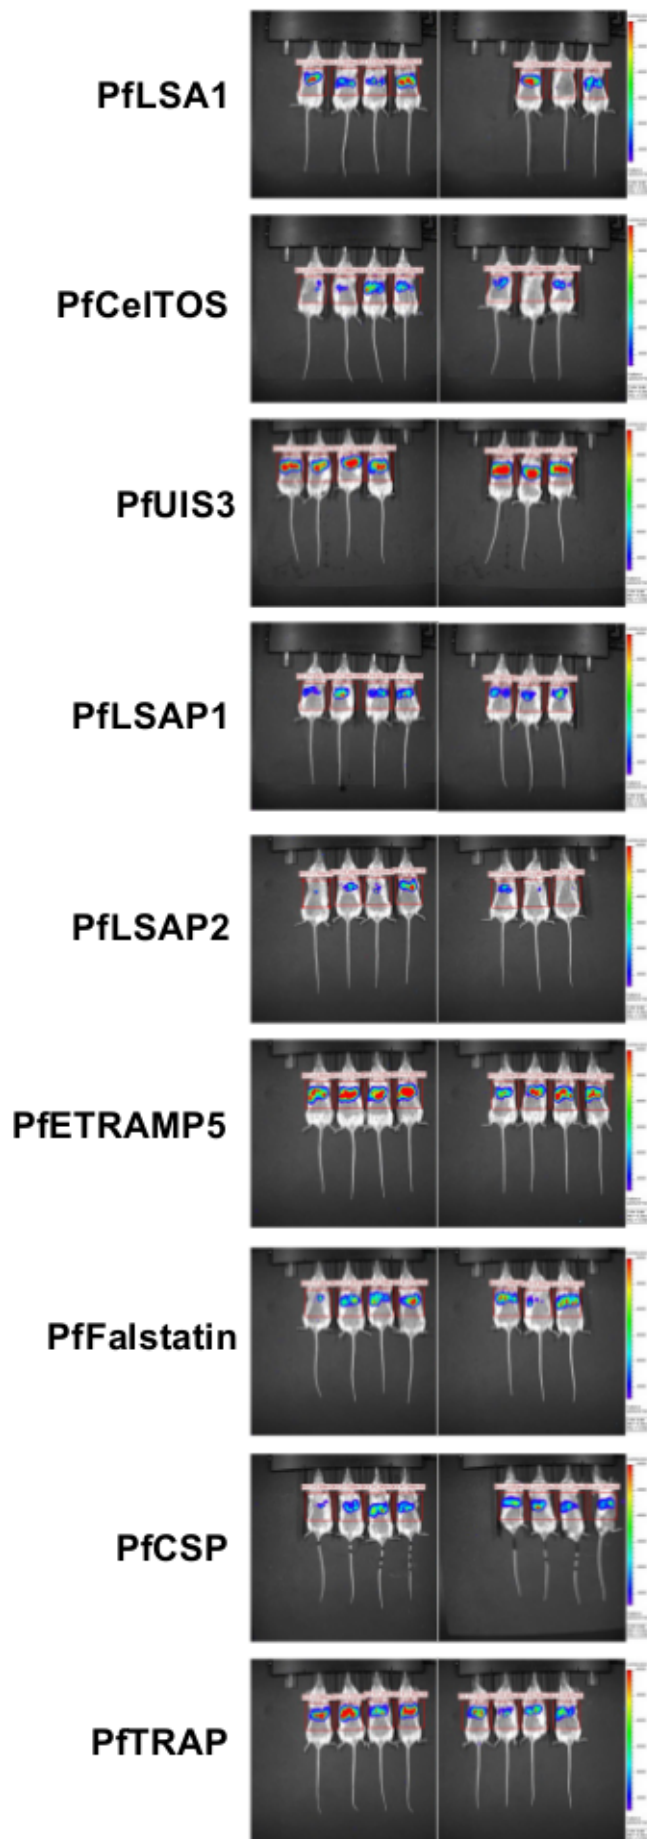

**Figure S4. All chimeric *P. berghei* parasites express the inserted antigen at the liver-stage of infection.** As each chimeric parasite also contained a GFP::luciferase reporter cassette, luciferase expression in chimeric *P. berghei* parasites was measured at 44 hours post-injection of 1000 sporozoites i.v. into seven to eight BALB/c mice, using the IVIS 200 *in vivo* imager. All chimeric parasites expressed luciferase at the liver-stage, providing an indirect confirmation of antigen expression at the liver-stage.

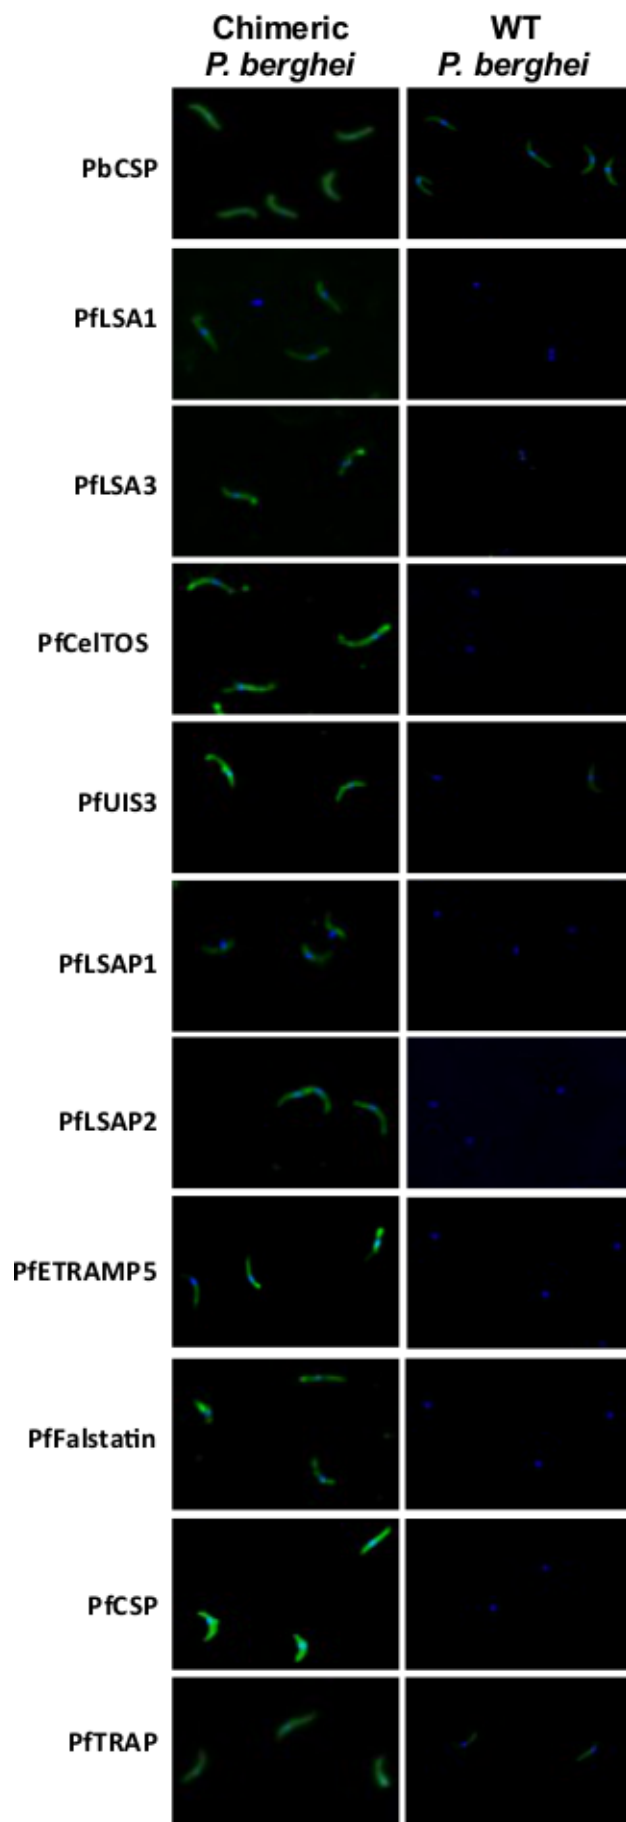

**Figure S5. All chimeric *P. berghei* sporozoites express the inserted *P. falciparum* antigen.** Chimeric salivary-gland sporozoites were stained with sera from vaccinated mice or with monoclonal antibodies where available (PbCSP 3D11 and PfCSP 2A10), with green fluorescence indicating the presence of the protein (Alexa Fluor 488). As a control, wild-type (WT) *P. berghei* sporozoites were stained with the same antibodies or sera.

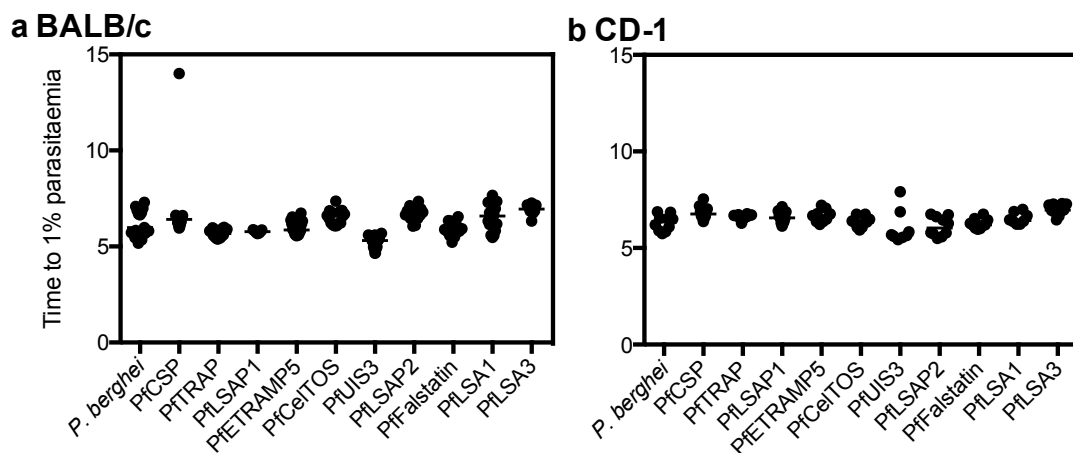

**Figure S6. Infectivity of the chimeric parasites in mice compared to wild-type *P. berghei*.** Time to 1% parasitaemia of the chimeric parasites compared to wild-type parasites following injection of 1000 sporozoites i.v, into (a) 7-22 BALB/c and (b) 8-10 CD-1 mice. Both median and individual data points are shown. All chimeric parasites are statistically comparable to wild-type (Mann-Whitney test), except for PfUIS3,  $p < 0.0001$ , and PfLSA3,  $p = 0.02$ , both in BALB/c, and PfCSP,  $p = 0.009$ , and PfLSA3,  $p = 0.0004$ , in CD-1 mice.

**Table S1.** Vaccine construct details.

| <b>Antigen</b> | <b>Gene ID<sup>a</sup></b> | <b>Size<sup>b</sup></b> | <b>Predicted Structure</b>                                         | <b>tPA</b> | <b>Final size<sup>b</sup></b> |
|----------------|----------------------------|-------------------------|--------------------------------------------------------------------|------------|-------------------------------|
| PfLSAP1        | PF3D7_1201300              | 318                     | Signal peptide, two<br>transmembrane domains                       | No         | 347                           |
| PfETRAMP5      | PF3D7_0532100              | 543                     | Signal peptide,<br>transmembrane domain,<br>repetitive region      | Yes        | 662                           |
| PfCeITOS       | PF3D7_1216600              | 546                     | Signal peptide                                                     | Yes        | 665                           |
| PfUIS3         | PF3D7_1302200              | 687                     | Signal peptide, two<br>transmembrane domains                       | No         | 716                           |
| PfLSAP2        | PF3D7_0202100              | 906                     | Non-secretory,<br>transmembrane domain                             | Yes        | 1025                          |
| PfFalstatin    | PF3D7_0911900              | 1239                    | Signal peptide                                                     | Yes        | 1358                          |
| PfLSA1         | PF3D7_1036400              | 3486                    | Signal peptide, repetitive<br>regions                              | Yes        | 1502                          |
| PfLSA3         | PF3D7_0220000              | 4674                    | Non-secretory, two<br>transmembrane domains,<br>repetitive regions | No         | 4259                          |

<sup>a</sup> PlasmoDB Gene ID. <sup>b</sup> Size in base pairs.
